# Supplementary material for: Two manganese chloride organic–inorganic hybrid compounds showing strong luminescence and switchable phase transition and dielectric anomaly
Source: Royal Society of Chemistry journal article supplement (doi:10.1039/d2nj03588j), 2022-01-01
Supplement: d2nj03588j1.pdf [file d2nj03588j1.pdf]

ESI

Two manganese chloride organic-inorganic hybrid compounds show strong  
luminescence and switchable phase transition and dielectric anomaly

Xiuli You,<sup>a</sup> Lingyu Wang,<sup>b</sup> Ziqin Peng,<sup>b</sup> Zhenhong Wei\*<sup>b</sup>

<sup>a</sup> Jiangxi Key Laboratory of Organic Chemistry, Jiangxi Science and Technology  
Normal University, Nanchang City, People's Republic of China

<sup>b</sup> School of Chemistry and Chemical Engineering, Nanchang University, Nanchang  
City, People's Republic of China

Corresponding author: [weizh@ncu.edu.cn](mailto:weizh@ncu.edu.cn)

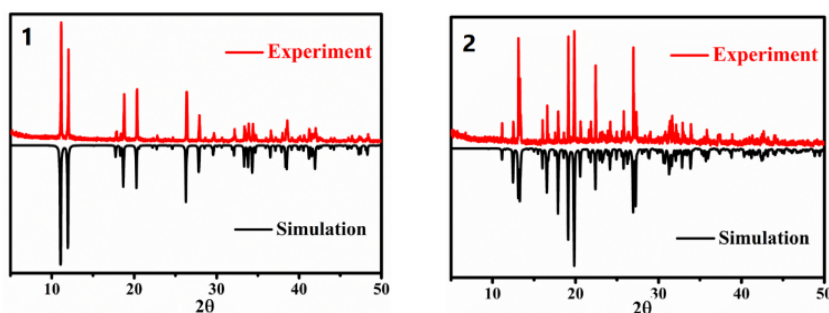

**Figure S1** P-XRD patterns of compounds **1** and **2** with the simulated one in black and the experimental one in red.

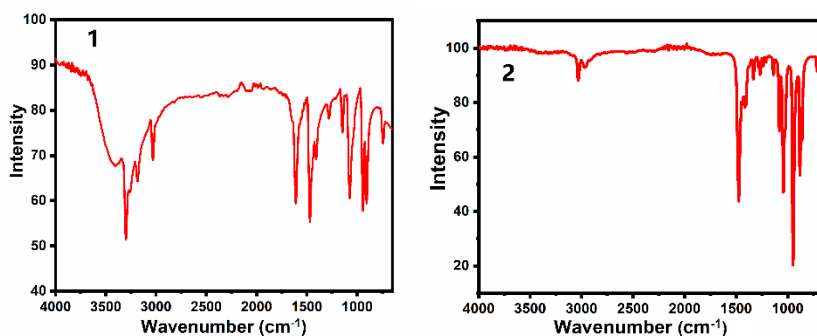

**Figure S2** Infrared spectra of compounds **1** and **2**

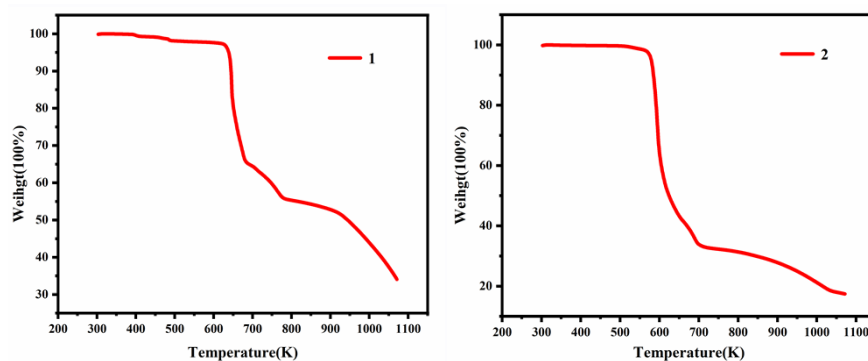

**Figure S3.** TG curves of solid compounds **1** and **2**

Table S1 The bond lengths [ $\text{\AA}$ ] and angles [ $^\circ$ ] of compound **1** at 298 K.

| label       | Lengths [ $\text{\AA}$ ] | label                 | Angles [ $^\circ$ ] |
|-------------|--------------------------|-----------------------|---------------------|
| Mn(1)-Mn(1) | 3.1975(10)               | Mn(1)-Mn(1)-Mn(1)     | 179.89(4)           |
| Mn(1)-Cl(2) | 2.5236(12)               | Cl(2)#1-Mn(1)-Cl(1)#1 | 84.84(3)            |
| Mn(1)-Cl(1) | 2.5657(9)                | Cl(2)-Mn(1)-Cl(1)#3   | 94.91(3)            |
| N(1)-N(2)   | 1.453(6)                 | Cl(2)-Mn(1)-Cl(1)     | 85.12(3)            |
|             |                          | Cl(2)#1-Mn(1)-Cl(1)   | 95.12(4)            |
|             |                          | Cl(1)#2-Mn(1)-Cl(1)   | 84.83(4)            |
|             |                          | Cl(1)#3-Mn(1)-Cl(1)   | 179.94(3)           |

Table S2 The bond lengths [ $\text{\AA}$ ] and angles [ $^\circ$ ] of compound **2** at 298 K.

| label       | Lengths [ $\text{\AA}$ ] | label             | Angles [ $^\circ$ ] |
|-------------|--------------------------|-------------------|---------------------|
| Mn(1)-Cl(3) | 2.3591(13)               | Cl(3)-Mn(1)-Cl(1) | 109.36(6)           |
| Mn(1)-Cl(1) | 2.3695(13)               | Cl(3)-Mn(1)-Cl(2) | 108.03(5)           |
| Mn(1)-Cl(2) | 2.3738(13)               | Cl(1)-Mn(1)-Cl(2) | 107.71(6)           |
| Mn(1)-Cl(4) | 2.3761(14)               | Cl(3)-Mn(1)-Cl(4) | 113.06(5)           |
|             |                          | Cl(1)-Mn(1)-Cl(4) | 110.37(5)           |
|             |                          | Cl(2)-Mn(1)-Cl(4) | 108.13(5)           |
